# Supplementary material for: Sample transformation in online separations: how chemical conversion advances analytical technology
Source: Royal Society of Chemistry journal article supplement (doi:10.1039/d3cc03599a), 2023-11-15
Supplement: d3cc03599a1.pdf [file d3cc03599a1.pdf]

## ELECTRONIC SUPPLEMENTARY INFORMATION

### Sample transformation in online separations: how chemical conversion advances analytical technology

Annika A.M. van der Zon <sup>† a, b</sup>, Joshka Verduin <sup>† b, c</sup>, Rick S. van den Hurk <sup>† a, b</sup>, Andrea F.G. Gargano <sup>a, b</sup>, Bob W.J. Pirok <sup>a, b, \*</sup>

<sup>a</sup> University of Amsterdam, van 't Hoff Institute for Molecular Sciences (HIMS), Analytical Chemistry Group, Science Park 904, 1098 XH Amsterdam, the Netherlands

<sup>b</sup> Centre of Analytical Sciences Amsterdam (CASA), Science Park 904, 1098 XH Amsterdam, the Netherlands

<sup>c</sup> Vrije Universiteit Amsterdam, Department of Chemistry and Pharmaceutical Sciences, Amsterdam Institute of Molecular and Life Sciences (AIMMS), Division of BioAnalytical Chemistry, De Boelelaan 1085, 1081 HV, Amsterdam, the Netherlands

<sup>†</sup> These authors contributed equally

\* Corresponding author

Bob W.J. Pirok [B.W.J.Pirok@uva.nl](mailto:B.W.J.Pirok@uva.nl)

## Contents

|                                                  |   |
|--------------------------------------------------|---|
| S-1 Overview of the described applications ..... | 3 |
| References .....                                 | 7 |

## S-1 Overview of the described applications

Table S1 summarizes the applications described in the manuscript based on the sample type (e.g. nanoparticles, polymers, or small molecules). For each sample type, the property of interest is highlighted along with the sample transformation that is applied, the approach used, the type of coupling, and the analytical technique. All abbreviations used in the table are described on the below the table.

**Table S1:** Overview of the properties of interest of the different sample types and its corresponding sample transformation and analytical method.

| Sample type       | Property of interest                                                           | Sample transformation | Approach                                                                | Coupling | Technique | Ref |
|-------------------|--------------------------------------------------------------------------------|-----------------------|-------------------------------------------------------------------------|----------|-----------|-----|
| <b>Antibodies</b> |                                                                                |                       |                                                                         |          |           |     |
| mAb and bsAb      | Charge variants, deamidation, oxidation, isomerization, peptide mapping        | MW reduction          | Enzymatic (Lys-C, trypsin), reduction (TCEP)                            | Online   | mD-LC-MS  | 1   |
| mAb               | Peptide sequencing                                                             | MW reduction          | Enzymatic (trypsin)                                                     | Online   | mD-LC-MS  | 2   |
| mAb               | Deamidation, isomerization, succinimide, peptide mapping                       | MW reduction          | Enzymatic (trypsin), reduction (DTT or TCEP)                            | Online   | mD-LC-MS  | 3   |
| mAb               | Charge variants, deamidation, isomerization, glycosylation, peptide mapping    | MW reduction          | Enzymatic (trypsin), reduction (DTT)                                    | Online   | mD-LC-MS  | 4   |
| mAb               | Oxidation, succinimide, deamidation or glycosylation (without peptide mapping) | MW reduction          | Enzymatic (trypsin), reduction (TCEP)                                   | Online   | mD-LC-MS  | 5   |
| mAb               | Glycosylation                                                                  | MW reduction          | Enzymatic (IdeS), reduction (TCEP)                                      | Online   | mD-LC-MS  | 6   |
| mAb               | Deamidation, oxidation, isomerization, glycosylation, peptide mapping          | MW reduction          | Enzymatic (IdeS, trypsin), reduction (TCEP)                             | Online   | mD-LC-MS  | 7   |
| mAb               | Deamidation, oxidation, glycation, peptide mapping                             | MW reduction          | Enzymatic (trypsin), reduction (DTT)                                    | Online   | mD-LC-MS  | 8   |
| mAb and bsAb      | Deamidation, oxidation, glycation, glycosylation, peptide mapping              | MW reduction          | Enzymatic (trypsin), reduction (DTT)                                    | Online   | mD-LC-MS  | 8   |
| bsAb              | Charge variants, size variants, peptide mapping                                | MW reduction          | Enzymatic (PNGase F, trypsin, Lys-C), reduction (gingiskhan, TCEP, DTT) | Online   | LC-MS     | 9   |
| mAb and bsAb      | Charge variants, deamidation, oxidation, isomerization, peptide mapping        | MW reduction          | Enzymatic (trypsin), reduction (TCEP)                                   | Online   | mD-LC-MS  | 10  |
| mAb               | Size variants, sequence variants, aggregates, glycosylation, glycation,        | MW reduction          | Enzymatic (trypsin)                                                     | Online   | mD-LC-MS  | 11  |
| bsAb              | Charge variants, deamidation, proline amidation, oxidation,                    | MW reduction          | Enzymatic (trypsin), reduction (DTT)                                    | Online   | mD-LC-MS  | 12  |

|                               |                                                                                                                                               |                                          |                                              |         |                       |    |
|-------------------------------|-----------------------------------------------------------------------------------------------------------------------------------------------|------------------------------------------|----------------------------------------------|---------|-----------------------|----|
| mAb                           | isomerization, succinimide, peptide mapping                                                                                                   | MW reduction                             | Enzymatic (trypsin)                          | Online  | mD-LC-MS              | 13 |
| mAb                           | Charge variants, deamidation, N-terminal glutamine cyclization, oxidation, proline amidation, peptide mapping                                 | MW reduction                             | Enzymatic (trypsin)                          | Online  | CZE-DAD               | 14 |
| mAb                           | Peptide mapping                                                                                                                               | MW reduction                             | Enzymatic (trypsin)                          | Online  | CZE-DAD               | 15 |
| mAb                           | Peptide mapping                                                                                                                               | MW reduction                             | Enzymatic (trypsin), offline-reduction (DTT) | Online  | CZE-DAD               | 16 |
| mAb                           | Fragment/peptide mapping                                                                                                                      | MW reduction                             | Enzymatic (IdeS)                             | Online  | CZE-MS                | 17 |
| mAb                           | Charge variants, deamidation, oxidation, peptide mapping                                                                                      | MW reduction                             | Enzymatic (Pepsin), reduction (TCEP)         | Online  | 2D-CZE-MS             | 18 |
| <b>ADC</b>                    |                                                                                                                                               |                                          |                                              |         |                       |    |
| ADC                           | Size variants, oxidation, deamidation, aggregates                                                                                             | MW reduction                             | Enzymatic (trypsin), reduction (TCEP)        | Online  | mD-LC-MS              | 19 |
| <b>Fc-fusion protein</b>      |                                                                                                                                               |                                          |                                              |         |                       |    |
| mAb and Fc-fusion protein     | Deamidation, succinimide formation, oxidation, C-terminal lysine clipping, N-terminal glutamine cyclization, glycosylation, proline amidation | MW reduction                             | Enzymatic (trypsin, Lys-C)                   | Online  | mD-LC-MS              | 20 |
| mAb and Fc-fusion protein     | Oxidation, succinimide, deamidation, isomerization, glycosylation, peptide mapping                                                            | MW reduction                             | Enzymatic (trypsin), reduction (TCEP)        | Online  | mD-LC-MS              | 21 |
| <b>Nucleic acid</b>           |                                                                                                                                               |                                          |                                              |         |                       |    |
| sgRNA                         | Nucleotide mapping                                                                                                                            | MW reduction                             | Enzymatic (RNase T1, A, U2)                  | Online  | mD-LC-MS              | 22 |
| gRNA                          | Nucleotide mapping                                                                                                                            | MW reduction                             | Enzymatic (RNase T1)                         | Online  | LC-MS                 | 23 |
| <b>Nanoparticles</b>          |                                                                                                                                               |                                          |                                              |         |                       |    |
| Polymeric (acrylic)           | Multi-attribute characterization (size, MW)                                                                                                   | Decomposition (disassembly)              | Solvent (organic)                            | Online  | HDC×SEC               | 24 |
| Polymeric (acrylic)           | Multi-attribute characterization (size, MW)                                                                                                   | Decomposition (disassembly)              | Solvent (organic)                            | Online  | HDC×SEC               | 25 |
| Medicinal (AAV)               | Multi-attribute characterization (empty/full, NP components)                                                                                  | Decomposition (disassembly)              | Chemical (pH)                                | Online  | AEX-RPLC              | 26 |
| Medicinal (AAV)               | Multi-attribute characterization (peptide mapping)                                                                                            | MW reduction                             | Enzymatic (trypsin, pepsin)                  | Offline | LC-MS/MS              | 27 |
| Medicinal/polymeric (PLGA)    | Protein adsorption                                                                                                                            | Decomposition (desorption), MW reduction | Reduction (DTT), enzymatic (trypsin)         | Offline | RPLC-MS/MS            | 28 |
| Medicinal (polymer)           | Drug release                                                                                                                                  | Decomposition (dissolution)              | Chemical (pH)                                | Offline | no LC (DLS, TEM, FLR) | 29 |
| Environmental                 | Polymer quantitation                                                                                                                          | MW reduction                             | Thermal                                      | Online  | PyGC-MS               | 30 |
| Medicinal/polymeric (ester)   | Drug release                                                                                                                                  | Decomposition (dissolution)              | Solvent                                      | Online  | RPLC-UV               | 31 |
| Polymeric                     | Polymer degradation (with microfluidic chip)                                                                                                  | MW reduction                             | Enzymatic (Novozym 51032 cutinase)           | Offline | RPLC-MS               |    |
| Polymeric (polyester)         | Polymer degradation (with IMER)                                                                                                               | MW reduction                             | Enzymatic (lipase)                           | Online  | SEC-ELSD              | 32 |
| <b>Synthetic polymers</b>     |                                                                                                                                               |                                          |                                              |         |                       |    |
| Copolymers (styrene/acrylate) | MWD, CCD, blockiness                                                                                                                          | MW reduction                             | Thermal                                      | Offline | SEC-Py-GC-MS          | 33 |

|                                                          |                                 |                           |                                                   |         |                                      |       |
|----------------------------------------------------------|---------------------------------|---------------------------|---------------------------------------------------|---------|--------------------------------------|-------|
| Homopolymers (styrene) and copolymers (styrene/acrylate) | MWD, CCD, blockiness            | MW reduction              | Thermal                                           | Online  | SEC-Py-GC-MS                         | 34    |
| Copolymers (amide)                                       | BLD                             | MW reduction              | CID                                               | Online  | LC-CID-MS/MS                         | 35,36 |
| Copolymers (carboxylic acid)                             | MWD, CCD                        | Derivatization            | Chemical                                          | Offline | SEC-dRI-UV                           | 36    |
| Copolymers (alcohol)                                     | FTD (end-groups)                | Derivatization            | Chemical                                          | Offline | CE-UV                                | 37    |
| Medicinal NPs/copolymers (ester)                         | TPs                             | Destruction               | Enzymatic (lipase)                                | Online  | SEC-ELSD                             | 32    |
| Copolymers (ester/amide)                                 | MWD                             | MW reduction              | Enzymatic ( $\alpha$ -chymotrypsin, proteinase K) | Offline | SEC-MS                               | 38    |
| Copolymers (ester/amide)                                 | TPs                             | Destruction               | Enzymatic ( $\alpha$ -chymotrypsin)               | Online  | SEC-MS                               | 39    |
| Copolymers(ester/urethane/urea)                          | MWD, TPs                        | MW reduction, destruction | Enzymatic (urease), chemical (hydrolysis)         | Offline | SEC-RID, RPLC-MS                     | 40    |
| Homopolymer (bisphenol A carbonate)                      | TPs                             | Destruction               | Chemical (hydrolysis)                             | Offline | LCCC/SEC-UV/IR/MS, LCCC $\times$ SEC | 41    |
| Copolymer (ester)                                        | TPs                             | Destruction               | Chemical (hydrolysis)                             | Offline | RPLC-UV                              | 42    |
| Homopolymer (propylene)                                  | TPs                             | Destruction               | Chemical, accelerated-aging chamber               | Offline | RPLC-UV-MS                           | 43    |
| Homopolymer (ethylene)                                   | TPs                             | Destruction               | Thermal oxidation                                 | Offline | NPLC-UV, GC $\times$ GC-MS           | 44    |
| Copolymer (ethylene/terephthalate)                       | photostability                  | Destruction               | Photodegradation                                  | Offline | IR                                   | 45    |
| Homopolymer (vinyl chloride)                             | photostability                  | Destruction               | Photodegradation                                  | Offline | IR, viscometry                       | 46    |
| Homopolymer (propylene)                                  | photostability, weathering      | Destruction               | Photodegradation                                  | Offline | IR                                   | 47    |
| <b>Small molecules</b>                                   |                                 |                           |                                                   |         |                                      |       |
| Cultural heritage (synthetic dyes)                       | TPs (photodegradation)          | Destruction               | Photodegradation                                  | Offline | LC-MS                                | 24    |
| Cultural heritage (synthetic dyes)                       | TPs (photodegradation)          | Destruction               | Photodegradation                                  | Offline | LC-UV                                | 48    |
| Cultural heritage (synthetic dyes)                       | TPs (photodegradation)          | Destruction               | Photodegradation                                  | Online  | LC-UV                                | 49    |
| Cultural heritage (synthetic dyes)                       | TPs (photodegradation)          | Destruction               | Photodegradation                                  | Both    | LC-UV                                | 50    |
| Cultural heritage (synthetic dyes)                       | TPs (photodegradation)          | Destruction               | Photodegradation                                  | Online  | 2D-LC-UV                             | 51    |
| Cultural heritage (synthetic dyes)                       | TPs (photodegradation)          | Destruction               | Photodegradation                                  | Online  | recycling-LC-UV                      | 52    |
| Pharmaceuticals (R&D drug)                               | TPs (phase I metabolism)        | Destruction               | Electrochemistry                                  | Both    | EC-LC-UV-MS                          | 53    |
| Pharmaceuticals (cytokinins)                             | TPs (phase I metabolism)        | Destruction               | Electrochemistry                                  | Online  | LC-EC-MS                             | 54    |
| Pharmaceuticals (cardiovascular drugs)                   | TPs (phase I and II metabolism) | Destruction               | Electrochemistry                                  | Online  | EC-LC-MS                             | 55    |
| Pharmaceuticals (cardiovascular drugs)                   | TPs (phase I metabolism)        | Destruction               | Electrochemistry                                  | Online  | EC-LC-MS                             | 56    |
| Pharmaceuticals (immunosuppressants)                     | TPs (phase I and II metabolism) | Destruction               | Electrochemistry                                  | Online  | EC-LC-MS                             | 57    |
| Pharmaceuticals (fluopyram)                              | TPs (phase I metabolism)        | Destruction               | Electrochemistry                                  | Online  | EC-LC-MS                             | 58    |
| Pharmaceuticals (thyroxine)                              | TPs (phase I metabolism)        | Destruction               | Electrochemistry                                  | Online  | EC-LC-MS                             | 59    |
| Food (vitamin D)                                         | TPs (phase I and II metabolism) | Destruction               | Electrochemistry                                  | Offline | LC-UV-MS                             | 60    |
| Food (citrus flavonoid)                                  | TPs (phase I and II metabolism) | Destruction               | Electrochemistry                                  | Offline | LC-MS                                | 61    |
| Food (lasalocid antibiotic)                              | TPs (phase I metabolism)        | Destruction               | Electrochemistry, enzymatic                       | Offline | LC-UV-MS                             | 62    |
| Food (aged liquors)                                      | TPs (aging)                     | Destruction               | Electrochemistry                                  | Offline | LC-MS                                | 63    |
| Environmental (herbicides)                               | TPs (environmental degradation) | Destruction               | Electrochemistry                                  | Offline | LC-MS                                | 64    |
| Environmental (insecticide)                              | TPs (phase I metabolism)        | Destruction               | Electrochemistry                                  | Online  | EC-LC-MS                             | 65    |

|                           |                                     |             |                                    |         |          |    |
|---------------------------|-------------------------------------|-------------|------------------------------------|---------|----------|----|
| Environmental (pesticide) | TPs (reductive metabolism)          | Destruction | Electrochemistry                   | Offline | LC-MS    | 66 |
| Environmental (PAHs)      | TPs (metabolism and photooxidation) | Destruction | Electrochemistry, photodegradation | Both    | EC-LC-MS | 67 |
| Environmental (pollutant) | TPs (phase I and II metabolism)     | Destruction | Electrochemistry                   | Offline | EC-LC-MS | 68 |

---

Adeno-associated virus (AAV), anion-exchange chromatography (AEX), antibody-drug conjugate (ADC), bispecific antibodies (bsAb), bond length distribution (BLD), capillary zone electrophoresis (CZE), chemical-composition distribution (CCD), collision-induced dissociation (CID), diode array detection (DAD), dithiothreitol (DTT), dynamic light scattering (DLS), electrochemistry (EC), evaporative light scattering detection (ELSD), fluorescence detection (FLR), functionality type distribution (FTD), gas chromatography (GC), guide ribonucleic acid (gRNA), hydrodynamic chromatography (HDC), immobilized-enzyme reactor (IMER), infrared (IR), liquid chromatography (LC), liquid chromatography at critical conditions (LCCC), mass spectrometry (MS), molecular weight (MW), molecular-weight distribution (MWD), monoclonal antibodies (mAb), multi-dimensional (mD), normal-phase liquid chromatography (NPLC), polyaromatic hydrocarbons (PAHs), poly(lactic-co-glycolic acid) (PLGA), pyrolysis (Py), refractive index detection (RID), research and development (R&D), reversed-phase liquid chromatography (RPLC), ribonuclease (RNase), ribonucleic acid (RNA), signal guide ribonucleic acid (sgRNA), size-exclusion chromatography (SEC), transformation product (TP), transmission electron microscopy (TEM), tris(2-carboxyethyl)phosphine (TCEP), two-dimensional (2D), ultraviolet detection (UV).

## References

- 1 S. Oezipek, S. Hoelterhoff, S. Breuer, C. Bell and A. Bathke, *Anal Chem*, 2022, **94**, 8136–8145.
- 2 L. M. H. Reinders, M. D. Klassen, T. Teutenberg, M. Jaeger and T. C. Schmidt, *Anal Bioanal Chem*, 2021, **413**, 7119–7128.
- 3 J. Camperi, I. Grunert, K. Heinrich, M. Winter, S. Özipek, S. Hoelterhoff, T. Weindl, K. Mayr, P. Bulau, M. Meier, M. Mølhøj, M. Leiss, D. Guillaume, A. Bathke and C. Stella, *Talanta*, 2021, **234**, 122628.
- 4 L. Verscheure, A. Cerdobbel, P. Sandra, F. Lynen and K. Sandra, *J Chromatogr A*, 2021, **1653**, 462409.
- 5 J. Camperi, L. Dai, D. Guillaume and C. Stella, *Anal Chem*, 2020, **92**, 8506–8513.
- 6 J. Camperi, L. Dai, D. Guillaume and C. Stella, *Anal Chem*, 2020, **92**, 4357–4363.
- 7 J. Camperi, D. Guillaume and C. Stella, *Anal Chem*, 2020, **92**, 13420–13426.
- 8 S. Pot, C. Gstöttner, K. Heinrich, S. Hoelterhoff, I. Grunert, M. Leiss, A. Bathke and E. Domínguez-Vega, *Anal Chim Acta*, 2021, **1184**, 339015.
- 9 K. Mayr, T. Weindl, A. Gärtner, J. Camperi, T. Maetzke, M. Förster, T. Nachtigall, F. Steiner, A. Vogt, F. Hosp and M. Mølhøj, *Anal Chem*, 2023, **95**, 3629–3637.
- 10 A. Goyon, L. Dai, T. Chen, B. Wei, F. Yang, N. Andersen, R. Kopf, M. Leiss, M. Mølhøj, D. Guillaume and C. Stella, *J Chromatogr A*, 2020, **1615**, 460740.
- 11 F. Kuhne, K. Heinrich, M. Winter, J. Fichtl, G. Hoffmann, F. Zähringer, K. Spitzauer, M. Meier, T. A. Khan, L. Bonnington, K. Wagner, J. O. Stracke, D. Reusch, H. Wegele, M. Mormann and P. Bulau, *Anal Chem*, 2023, **95**, 2203–2212.
- 12 I. Grunert, K. Heinrich, M. Hingar, J. Ernst, M. Winter, K. Bomans, K. Wagner, A. Fevre, D. Reusch, M. Wuhrer and P. Bulau, *J Am Soc Mass Spectrom*, 2022, **33**, 2319–2327.
- 13 Z. Liu, Y. Cao, L. Zhang, Y. Xu and Z. Zhang, *Anal Chem*, 2023, **95**, 7977–7984.
- 14 Y. Ladner, S. Mas, G. Coussot, J. Montels and C. Perrin, *Talanta*, 2019, **193**, 146–151.
- 15 Y. Ladner, S. Mas, G. Coussot, K. Bartley, J. Montels, J. Morel and C. Perrin, *J Chromatogr A*, 2017, **1528**, 83–90.
- 16 M. Dadouch, Y. Ladner, C. Bich, J. Montels, J. Morel and C. Perrin, *Electrophoresis*, 2021, **42**, 1229–1237.
- 17 M. Dadouch, Y. Ladner, C. Bich, M. Larroque, C. Larroque, J. Morel, P.-A. Bonnet and C. Perrin, *Analyst*, 2020, **145**, 1759–1767.
- 18 J. Schlecht, K. Jooß, B. Moritz, S. Kiessig and C. Neusüß, *Anal Chem*, 2023, **95**, 4059–4066.
- 19 A. Goyon, M. Kim, L. Dai, C. Cornell, F. Jacobson, D. Guillaume and C. Stella, *Anal Chem*, 2019, **91**, 14896–14903.
- 20 J. Camperi, S. Dahotre, D. Guillaume and C. Stella, *Talanta*, 2022, **246**, 123519.
- 21 S. Dahotre, L. Dai, K. Kjenstad, C. Stella and J. Camperi, *J Chromatogr A*, 2022, **1672**, 463067.
- 22 A. Goyon, B. Scott, K. Kurita, C. Maschinot, K. Meyer, P. Yehl and K. Zhang, *Anal Chem*, 2022, **94**, 1169–1177.
- 23 A. Goyon, D. Nguyen, S. Boulanouar, P. Yehl and K. Zhang, *Anal Chem*, 2022, **94**, 16960–16966.
- 24 B. W. J. Pirok, G. Moro, N. Meekel, S. V. J. Berbers, P. J. Schoenmakers and M. R. van Bommel, *J Cult Herit*, 2019, **38**, 29–36.
- 25 B. W. J. Pirok, N. Abdulhussain, T. Aalbers, B. Wouters, R. A. H. Peters and P. J. Schoenmakers, *Anal Chem*, 2017, **89**, 9167–9174.

- 26 Z. Wu, H. Wang, A. Tustian, H. Qiu and N. Li, *Anal Chem*, 2022, **94**, 3219–3226.
- 27 E. N. Toole, C. Dufresne, S. Ray, A. Schwann, K. Cook and A. R. Ivanov, *Anal Chem*, 2021, **93**, 10403–10410.
- 28 H. Spreen, C. Barth, L. Keuter, D. Mulac, H.-U. Humpf and K. Langer, *J Drug Deliv Sci Technol*, 2022, **74**, 103543.
- 29 P. Samanta, K. Kapat, S. Maiti, G. Biswas, S. Dhara and D. Dhara, *J Colloid Interface Sci*, 2019, **555**, 132–144.
- 30 H. A. Leslie, M. J. M. van Velzen, S. H. Brandsma, A. D. Vethaak, J. J. Garcia-Vallejo and M. H. Lamoree, *Environ Int*, 2022, **163**, 107199.
- 31 A. Helle, S. Hirsjärvi, L. Peltonen, J. Hirvonen, S. K. Wiedmer and T. Hyötyläinen, *J Pharm Biomed Anal*, 2010, **51**, 125–130.
- 32 B. Wouters, B. W. J. Pirok, D. Soulis, R. C. Garmendia Perticarini, S. Fokker, R. S. van den Hurk, M. Skolimowski, R. A. H. Peters and P. J. Schoenmakers, *Anal Chim Acta*, 2019, **1053**, 62–69.
- 33 W. C. Knol, T. Gruending, P. J. Schoenmakers, B. W. J. Pirok and R. A. H. Peters, *J Chromatogr A*, 2022, **1670**, 462973.
- 34 W. C. Knol, J. P. H. Smeets, T. Gruending, B. W. J. Pirok and R. A. H. Peters, *J Chromatogr A*, 2023, **1690**, 463800.
- 35 Y. Mengerink, H. Philipsen, J. Jordens, J. Mengerink, R. van der Hoeven and R. A. H. Peters, *J Appl Polym Sci*, , DOI:10.1002/app.53683.
- 36 T. Brooijmans, R. A. Okhuijsen, G. M. M. Oerlemans, B. W. J. Pirok, P. J. Schoenmakers and R. A. H. Peters, *Anal Chim Acta*, 2019, **1072**, 87–94.
- 37 K. A. Oudhoff, F. A. VanDamme, E. P. C. Mes, P. J. Schoenmakers and W. Th. Kok, *J Chromatogr A*, 2004, **1046**, 263–269.
- 38 A. Ghaffar, G. J. J. Draaisma, G. Mihov, A. A. Dias, P. J. Schoenmakers and S. van der Wal, *Biomacromolecules*, 2011, **12**, 3243–3251.
- 39 A. Ghaffar, G. J. J. Draaisma, G. Mihov, P. J. Schoenmakers and S. van der Wal, *J Chromatogr A*, 2013, **1286**, 29–40.
- 40 C. K. Borrowman, M. Bücking, B. Göckener, R. Adhikari, K. Saito and A. F. Patti, *Polym Degrad Stab*, 2020, **178**, 109218.
- 41 L. Coulier, E. R. Kaal and Th. Hankemeier, *Polym Degrad Stab*, 2006, **91**, 271–279.
- 42 M. Pourasghar, A. Koenneke, P. Meiers and M. Schneider, *J Pharm Anal*, 2019, **9**, 100–107.
- 43 S. Beißmann, M. Stiftinger, K. Grabmayer, G. Wallner, D. Nitsche and W. Buchberger, *Polym Degrad Stab*, 2013, **98**, 1655–1661.
- 44 N. Wolf, S. Säger, M. Lommatzsch and T. J. Simat, *Polym Degrad Stab*, 2021, **185**, 109490.
- 45 G. J. M. Fechine, P. A. Christensen, T. A. Egerton and J. R. White, *Polym Degrad Stab*, 2009, **94**, 234–239.
- 46 E. Yousif, N. Salih and J. Salimon, *J Appl Polym Sci*, 2011, **120**, 2207–2214.
- 47 Z. An, Z. Xu, Y. Ye and R. Yang, *Anal Chim Acta*, 2021, **1169**, 338632.
- 48 I. Groeneveld, S. E. Schoemaker, G. W. Somsen, F. Ariese and M. R. van Bommel, *Analyst*, 2021, **146**, 3197–3207.
- 49 I. Groeneveld, I. Bagdonaite, E. Beekwilder, F. Ariese, G. W. Somsen and M. R. van Bommel, *Anal Chem*, 2022, **94**, 7647–7654.
- 50 M. J. den Uijl, A. Lokker, B. van Dooren, P. J. Schoenmakers, B. W. J. Pirok and M. R. van Bommel, *Dyes and Pigments*, 2022, **197**, 109882.



- 51 M. J. den Uijl, Y. J. H. L. van der Wijst, I. Groeneveld, P. J. Schoenmakers, B. W. J. Pirok and M. R. van Bommel, *Anal Chem*, 2022, **94**, 11055–11061.
- 52 M. J. den Uijl, I. Bagdonaite, P. J. Schoenmakers, B. W. J. Pirok and M. R. van Bommel, *J Chromatogr A*, 2023, **1688**, 463723.
- 53 S. Torres, R. Brown, T. Zelesky, G. Scrivens, R. Szucs, J. M. Hawkins and M. R. Taylor, *J Pharm Biomed Anal*, 2016, **131**, 71–79.
- 54 M. Karady, O. Novák, A. Horna, M. Strnad and K. Doležal, *Electroanalysis*, 2015, **27**, 406–414.
- 55 M. Szultka-Młyńska, S. Bajkacz, I. Baranowska and B. Buszewski, *Talanta*, 2018, **176**, 262–276.
- 56 M. Szultka-Młyńska, S. Bajkacz, M. Kaca, I. Baranowska and B. Buszewski, *Journal of Chromatography B*, 2018, **1093–1094**, 100–112.
- 57 M. Szultka-Mlynska and B. Buszewski, *J Pharm Biomed Anal*, 2019, **176**, 112799.
- 58 T. F. Mekonnen, U. Panne and M. Koch, *Anal Bioanal Chem*, 2018, **410**, 2607–2617.
- 59 C. K. Mak, C. A. Wehe, M. Sperling and U. Karst, *J Chromatogr A*, 2015, **1419**, 81–88.
- 60 Navarro Suarez, Thein, Kallinich and Rohn, *Molecules*, 2019, **24**, 2369.
- 61 Z.-X. Yue, Y.-X. Gu, T.-C. Yan, F.-M. Liu, J. Cao and L.-H. Ye, *Food Chem*, 2022, **380**, 132202.
- 62 L. Knoche, J. Lisec and M. Koch, *Rapid Communications in Mass Spectrometry*, , DOI:10.1002/rcm.9349.
- 63 Q. Zheng, Z. Wang, A. Xiong, Y. Hu, Y. Su, K. Zhao and Y. Yu, *Food Chem*, 2021, **355**, 129596.
- 64 R. C. Tonleu Temgoua, U. Bussy, D. Alvarez-Dorta, N. Galland, E. Njanja, J. Hémez, C. Thobie-Gautier, I. K. Tonlé and M. Boujtita, *Environ Sci Process Impacts*, 2021, **23**, 1600–1611.
- 65 T. F. Mekonnen, U. Panne and M. Koch, *Anal Bioanal Chem*, 2017, **409**, 3359–3368.
- 66 U. Bussy, Y.-W. Chung-Davidson, K. Li and W. Li, *Environ Sci Technol*, 2015, **49**, 4450–4457.
- 67 T. Wigger, A. Seidel and U. Karst, *Chemosphere*, 2017, **176**, 202–211.
- 68 B. Seiwert, N. Golan-Rozen, C. Weidauer, C. Riemenschneider, B. Chefetz, Y. Hadar and T. Reemtsma, *Environ Sci Technol*, 2015, **49**, 12342–12350.
